# Supplementary material
Source: publisher site journal article supplement (https://www.dovepress.com/get_supplementary_file.php?f=361400.docx)
Supplement: Supplementary file 1 [file get_supplementary_file.php]

**Supplementary Materials**

**Figures and Legends**

**
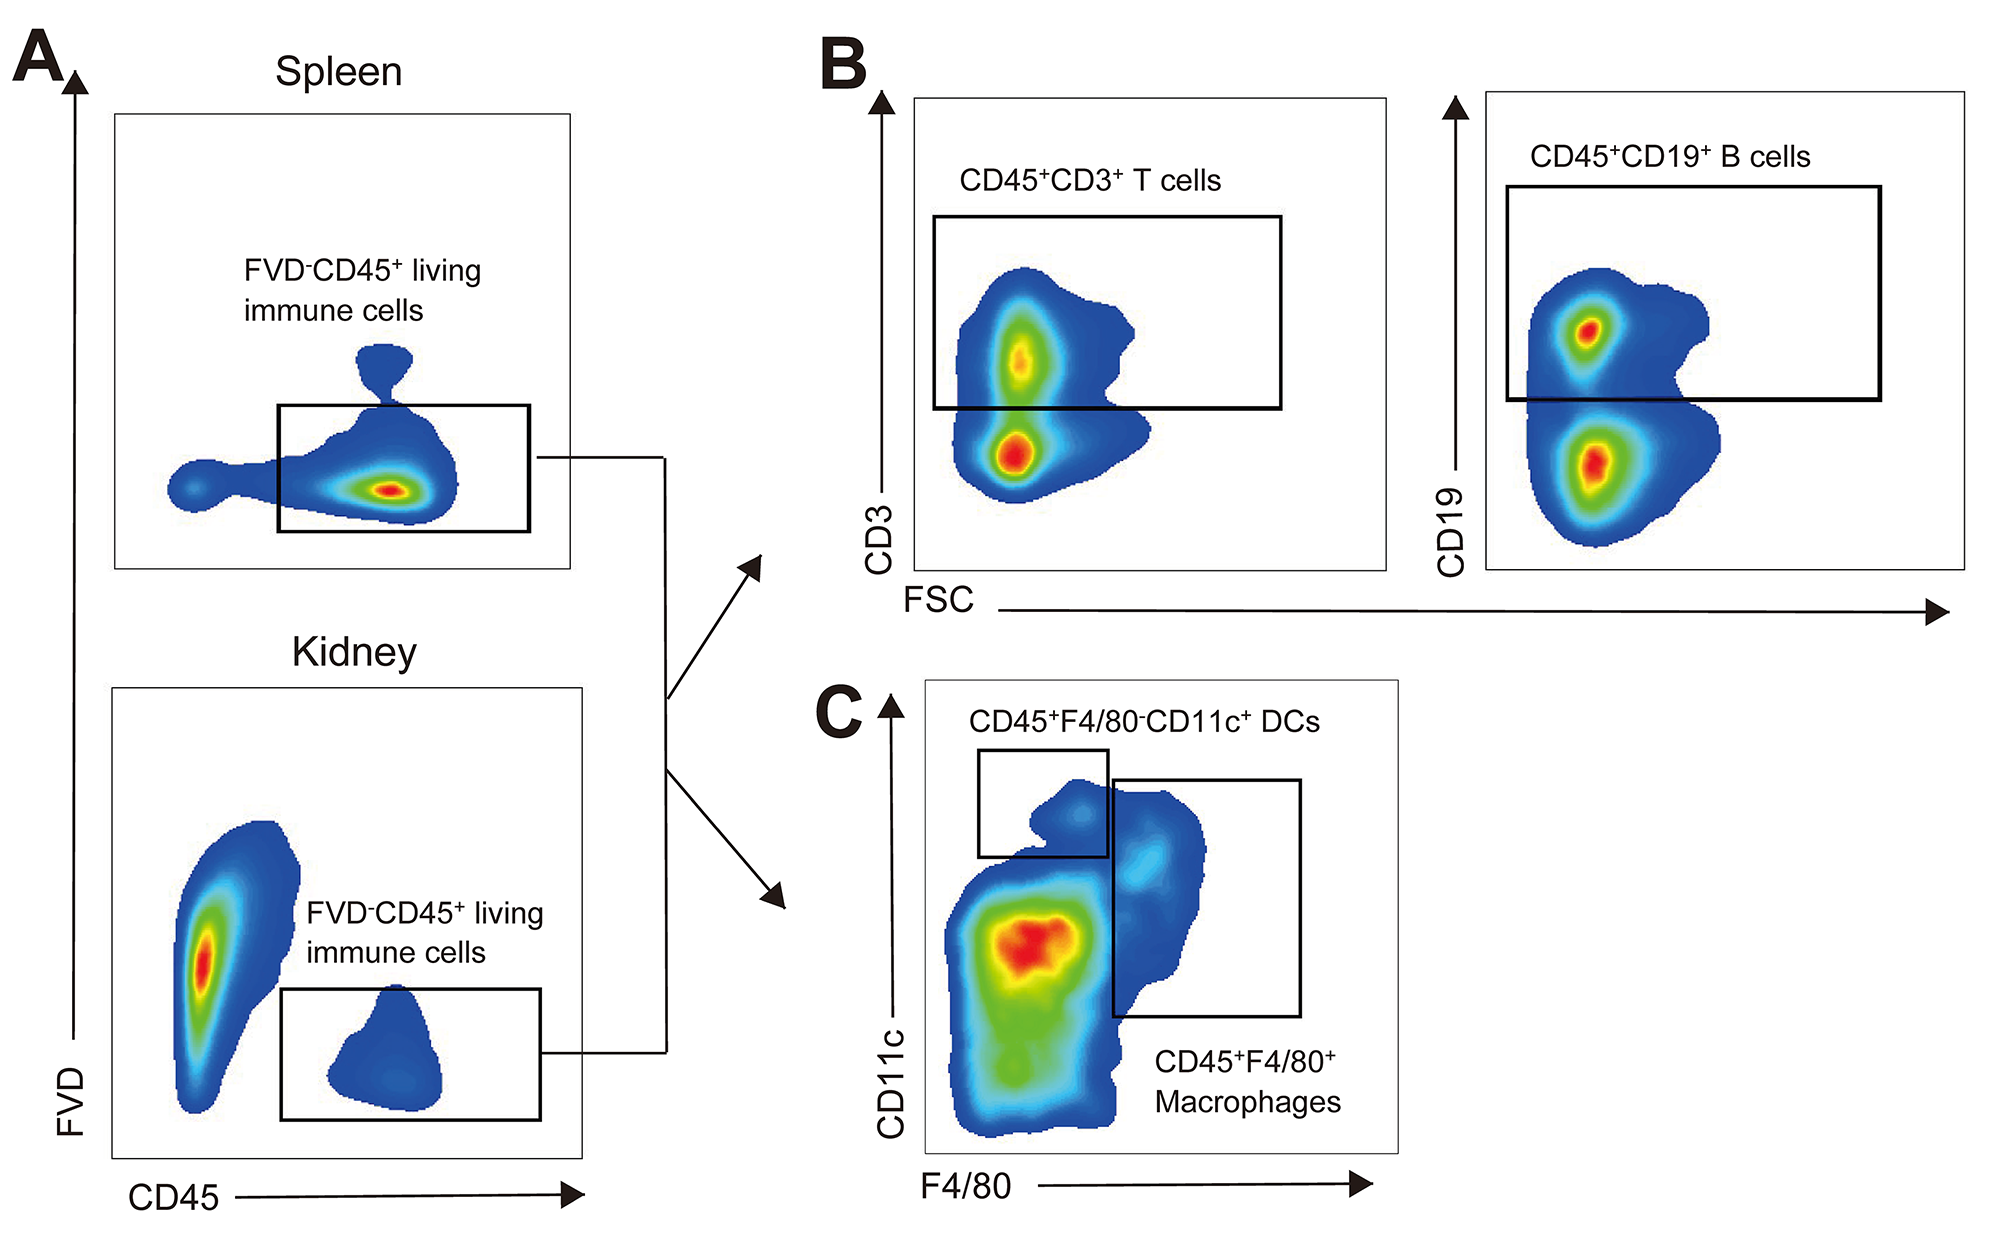
**

**Figure S1** The flow cytometry gating strategy of splenic and renal immune cells. (**A**) FVD-CD45+ living immune cells were firstly gated in total cells from spleen or kidney. (**B**) T cells and B cells were then gated as CD3+ and CD19+ cells in CD45+ immune cells, respectively. (**C**) DCs and macrophages were gated as F4/80-CD11c+ cells and F4/80+ cells in CD45+ immune cells, respectively.


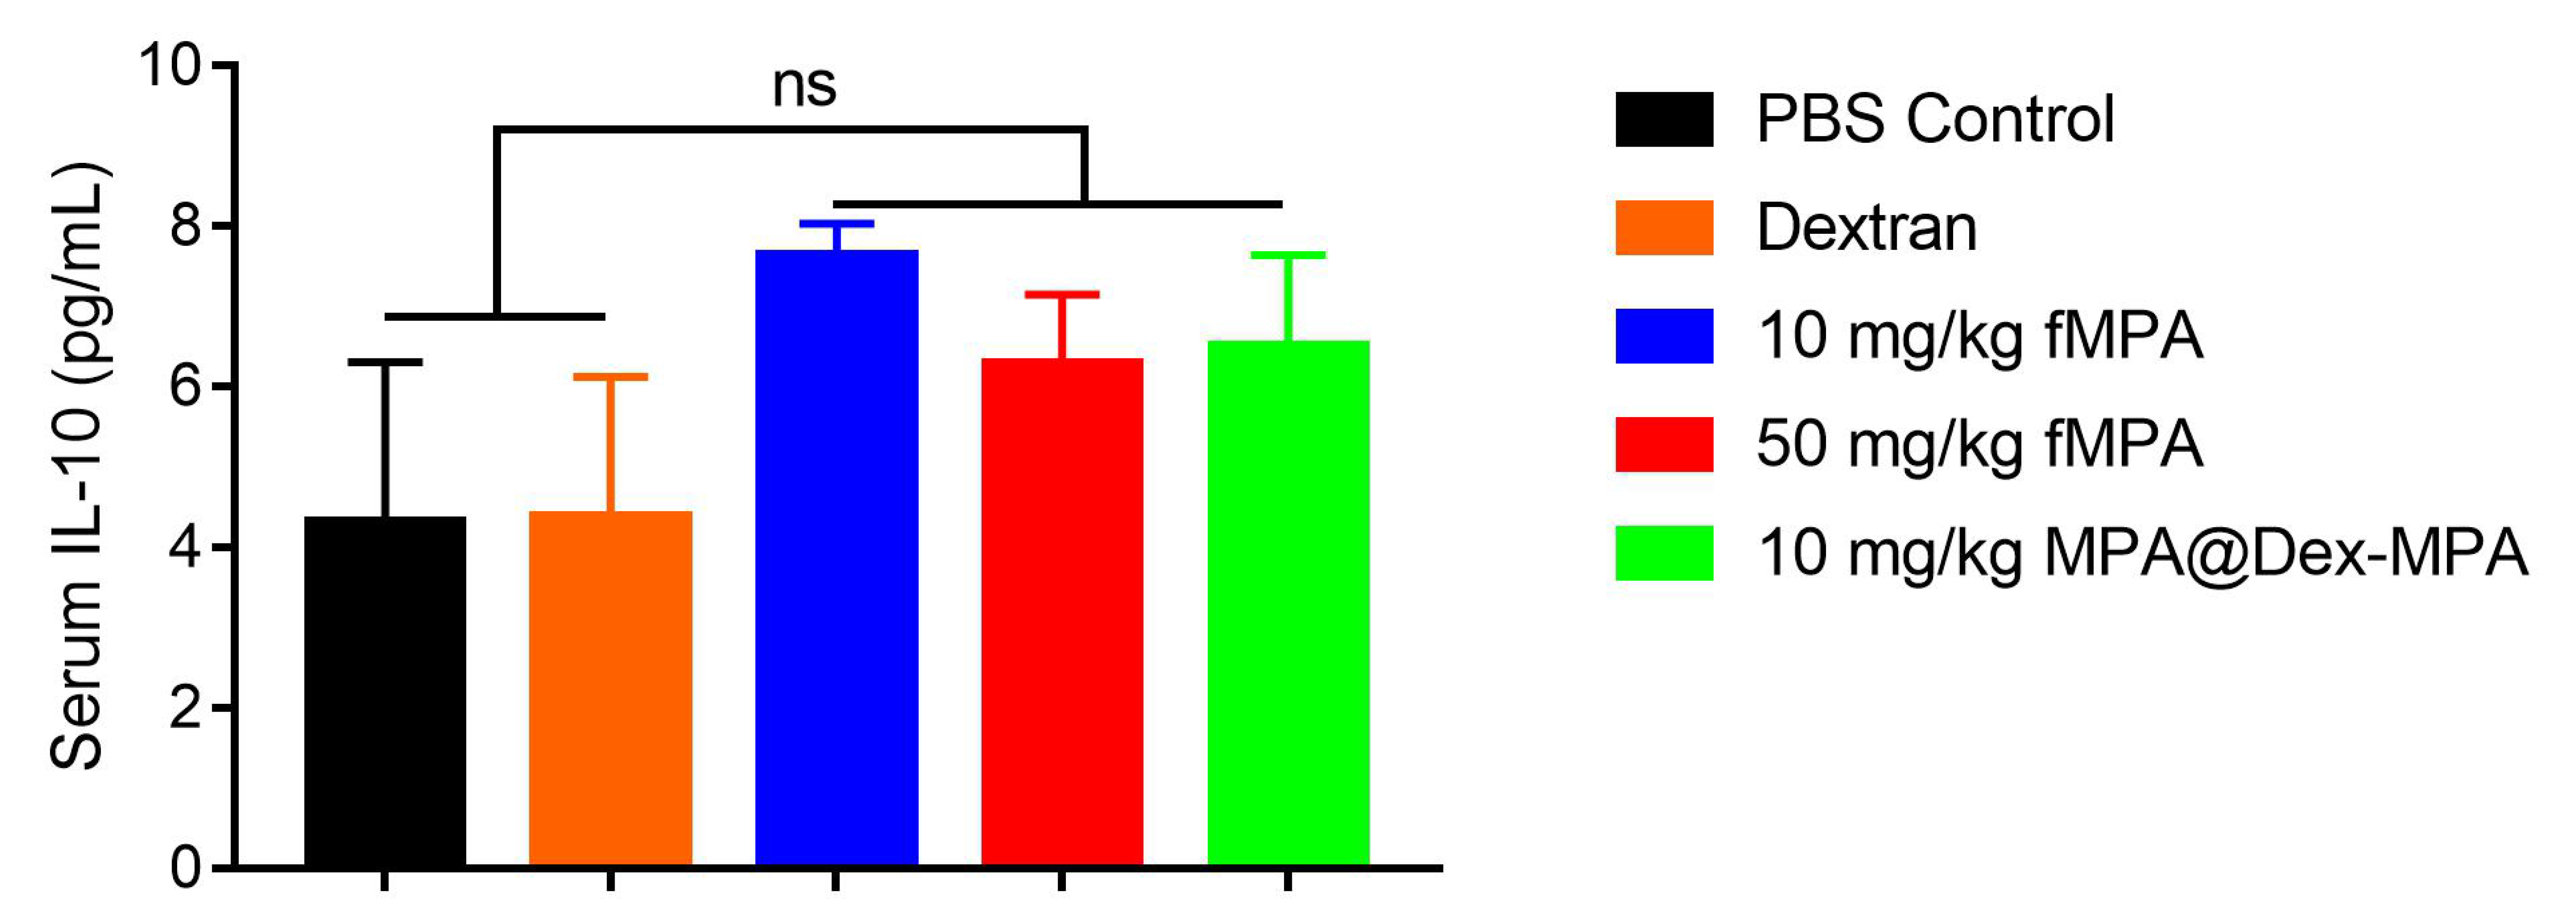


**Figure S2** MPA@Dex-MPA NPs elevated serum IL-10 in MRL/*lpr* mice. Serum level of IL-10 at the end of experiment analyzed using cytometric bead array (n = 4-6/group). Error bar represent mean ± SEM; ns, not significant.


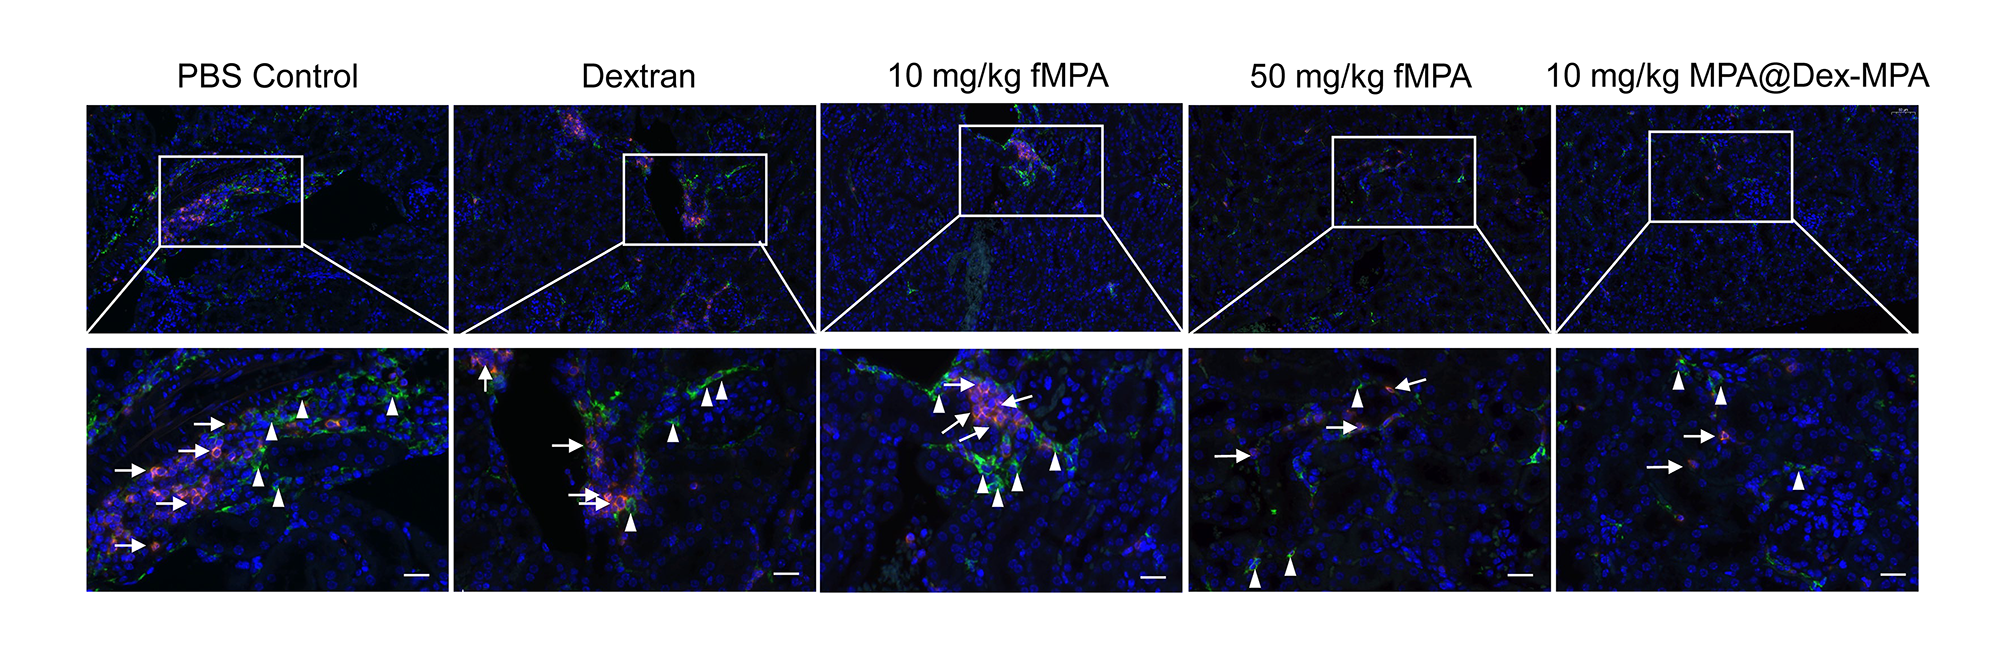


**Figure S3** The representative immunofluorescence micrographs of the T cells and macrophages in the kidney of MRL/*lpr* mice*.* Green, F4/80, pointed by white triangles; red, CD3, pointed by white arrows; blue, nucleus; n = 4-6/group. Scale bar, 20 μm.


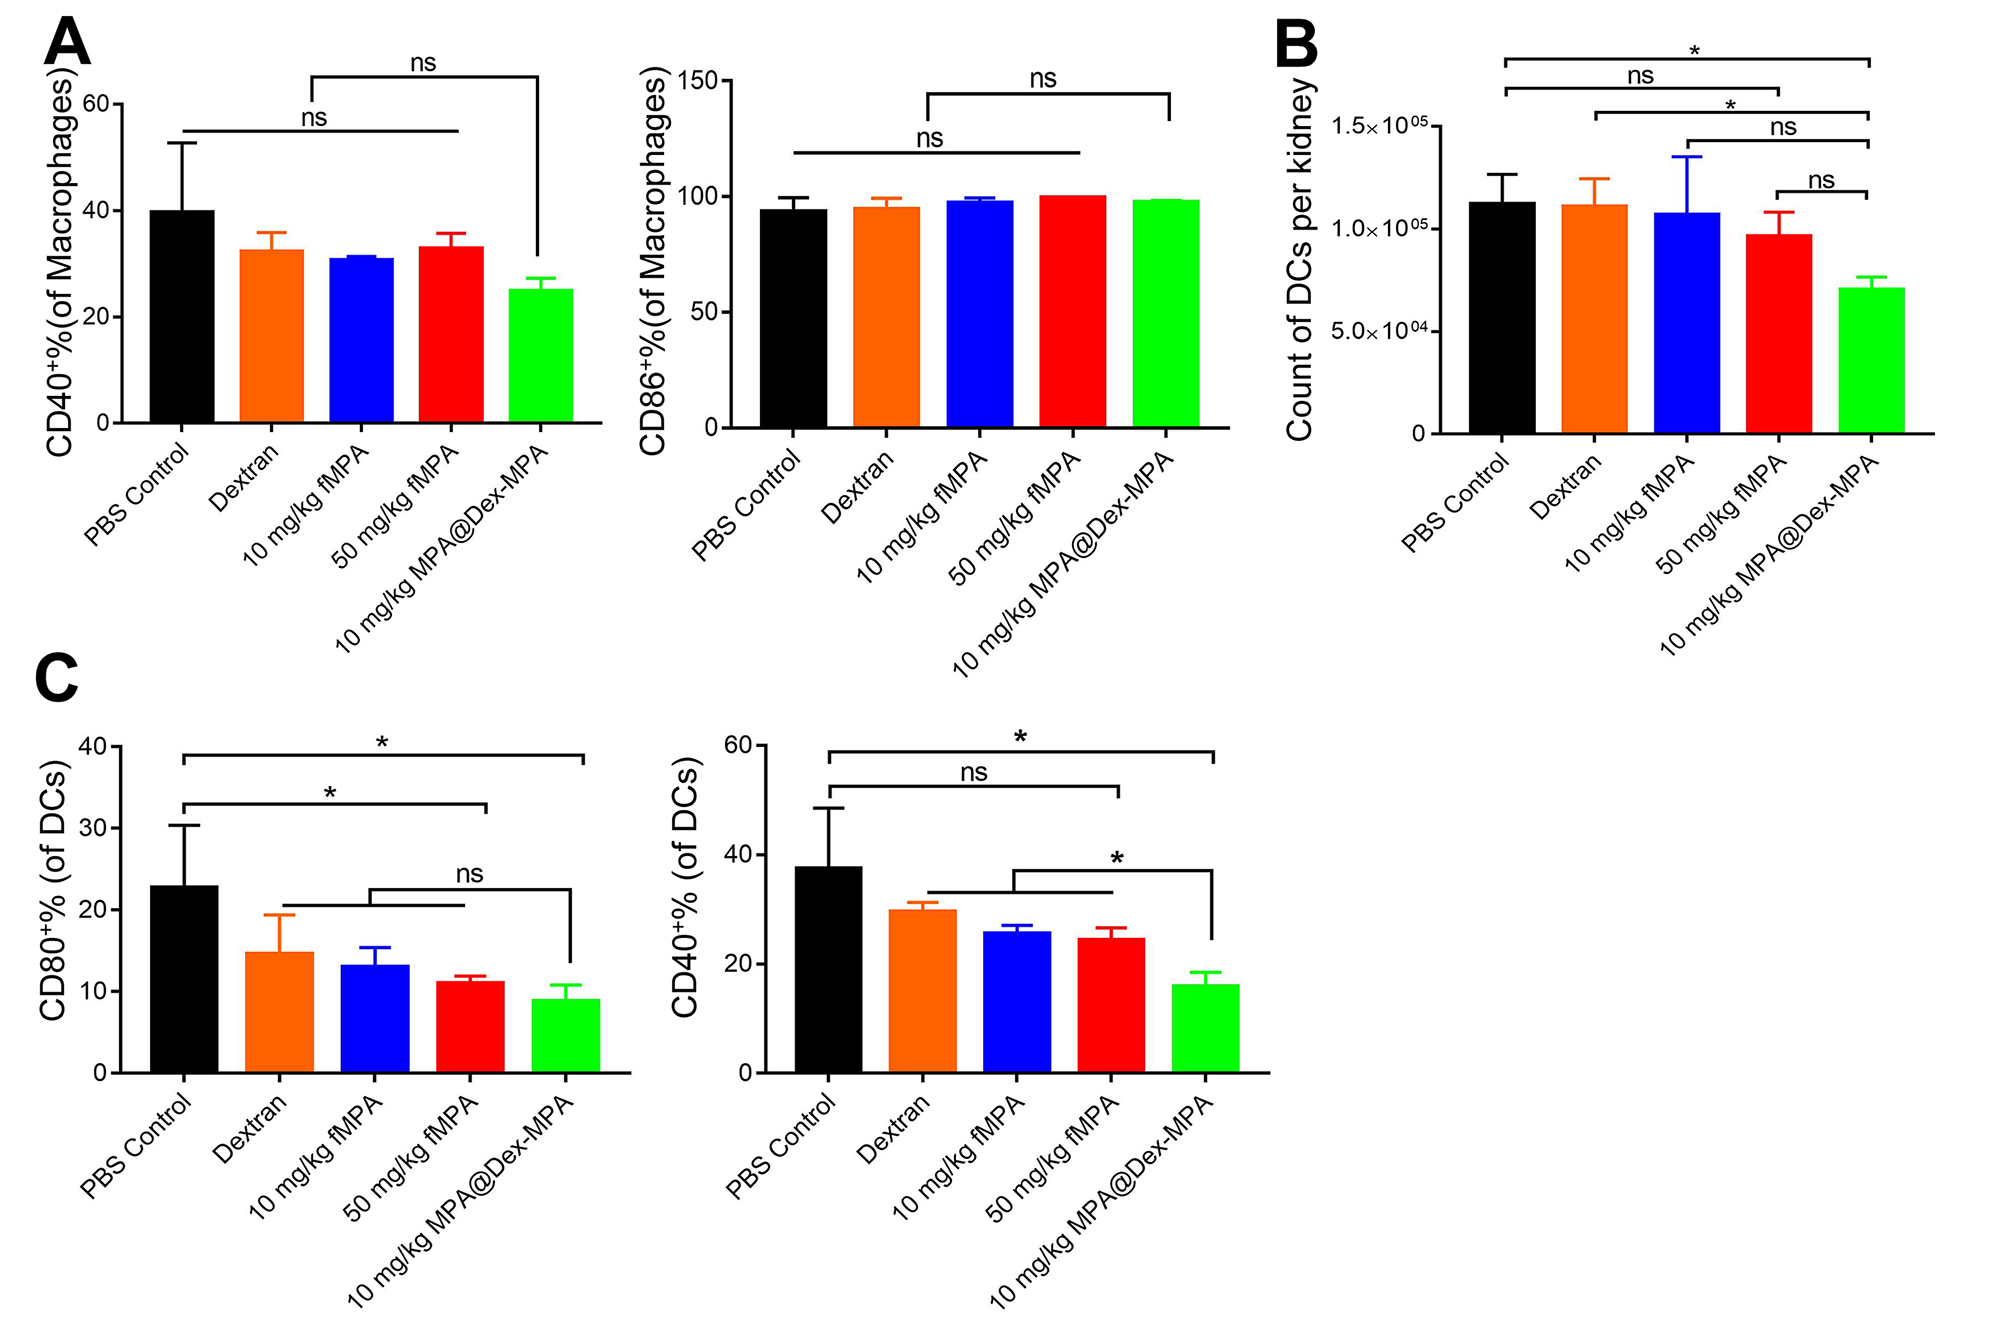


**Figure S4** MPA@Dex-MPA NPs therapy’s effect on the phenotype of macrophages, the infiltration and activation of DCs in the kidney of MRL/*lpr* mice. (**A**) The percent of CD40 and CD86-positive cells among macrophages in kidney through flow cytometry analysis (n = 4-6/group). (**B**) The count of infiltrated DCs per kidney was calculated using precision count beads through flow cytometry (n = 4-6/group). (**C**) The percent of CD80 and CD40-positive cells among DCs in kidney through flow cytometry analysis (n = 4-6/group). Error bar represent mean ± SEM. **P* < 0.05, ***P* < 0.01, ****P* < 0.001, ns, not significant.


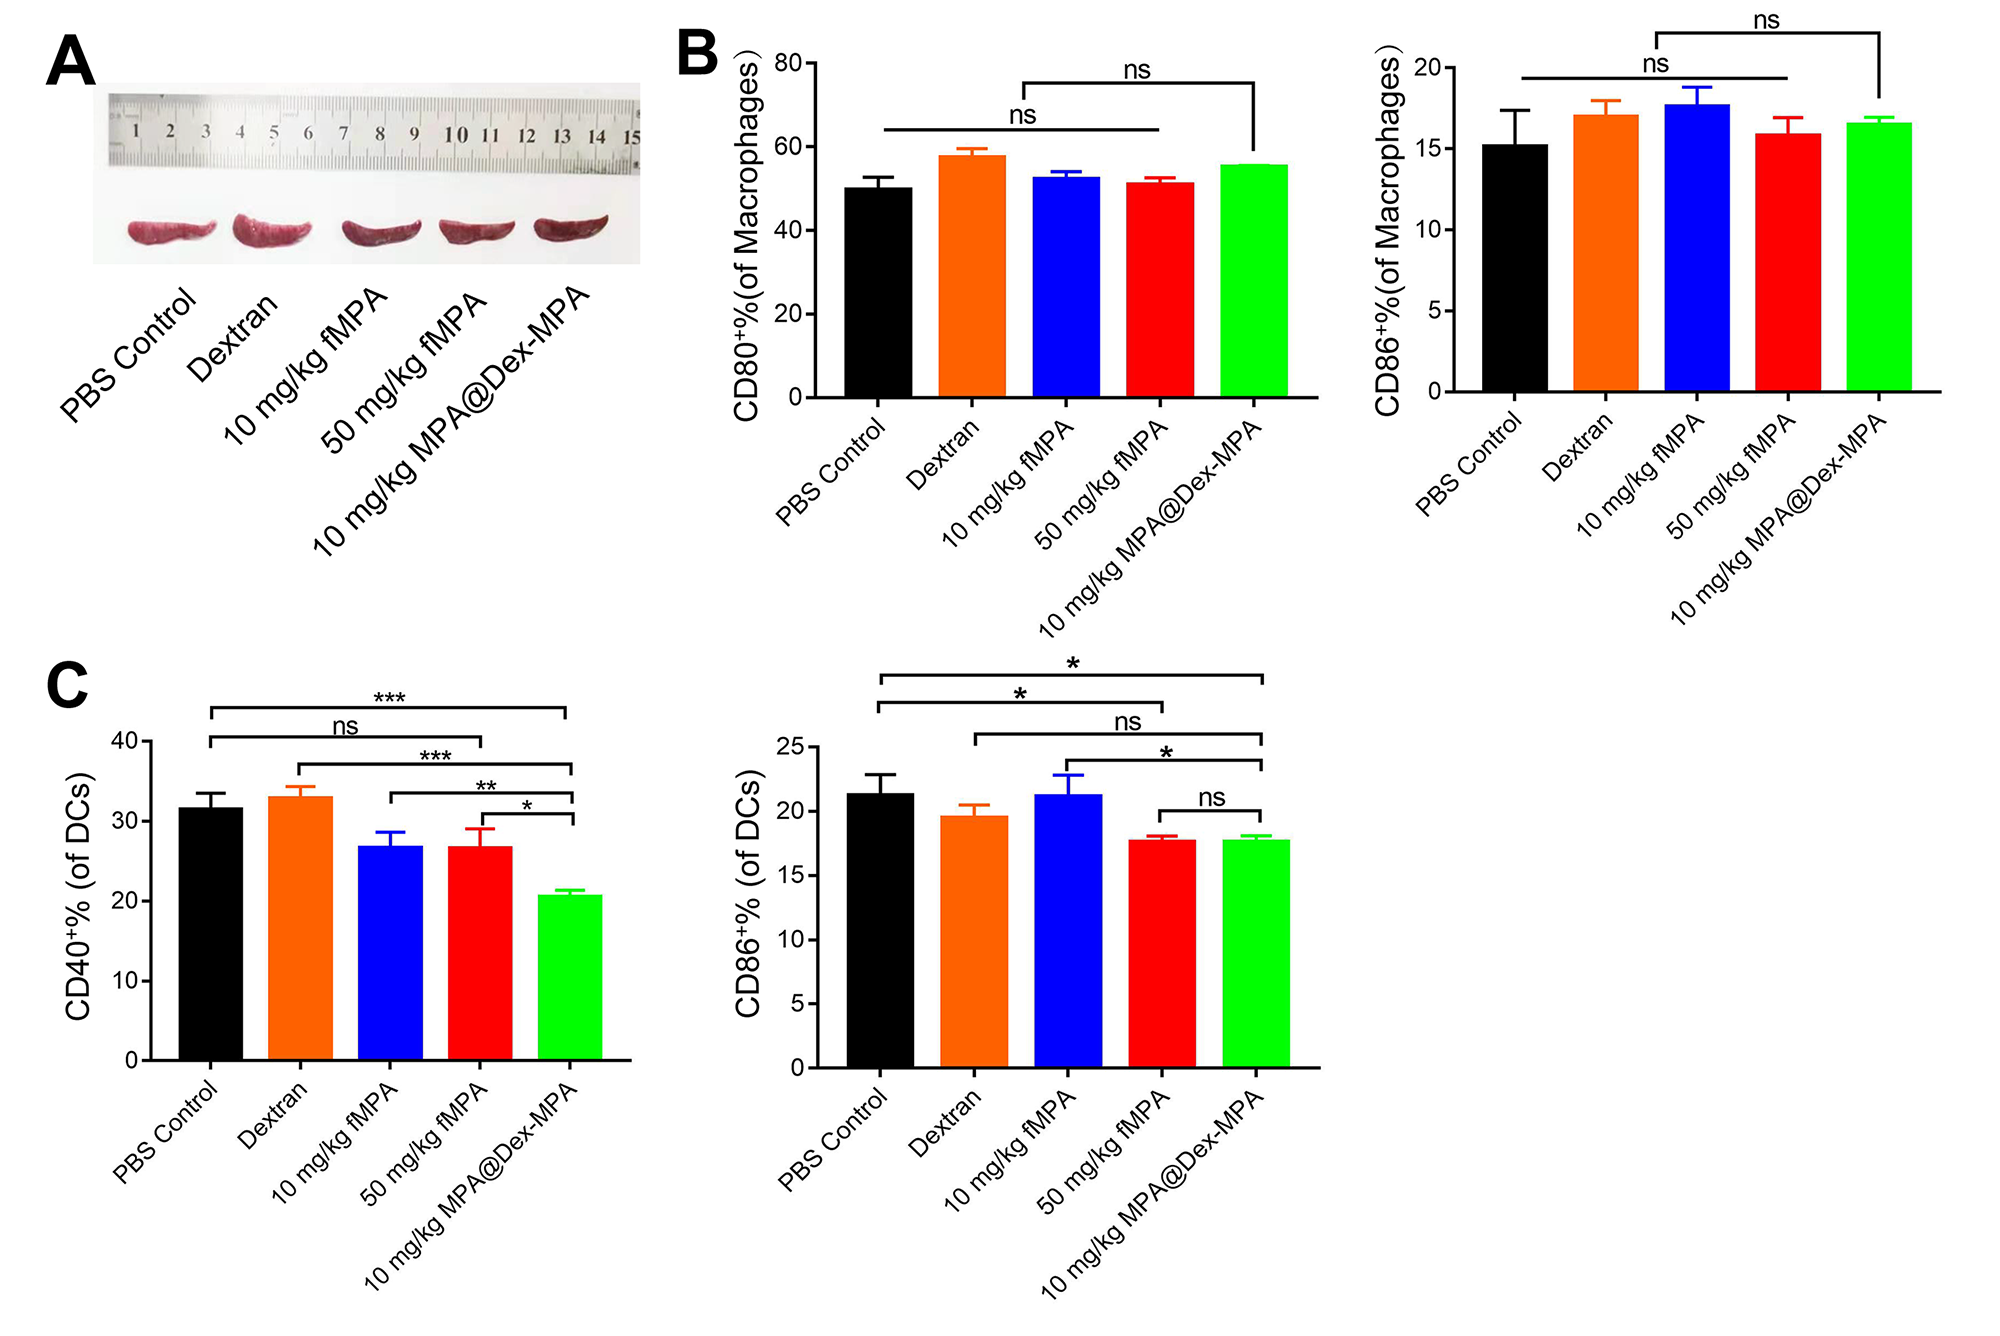


**Figure S5** MPA@Dex-MPA NPs therapy’s effect on the activation of the macrophages and DCs in the spleen of MRL/*lpr* mice. (**A**) Representative photographs of the spleens from MRL/*lpr* mice. (**B**) The percent of CD80 and CD86-positive cells among F4/80+ macrophages in spleen through flow cytometry analysis (n = 4-6/group). (**C**) The percent of CD40 and CD86-positive cells among CD11c+ DCs in spleen through flow cytometry analysis (n = 4-6/group). Error bar represent mean ± SEM. **P* < 0.05, ***P* < 0.01, ****P* < 0.001, ns, not significant.

**
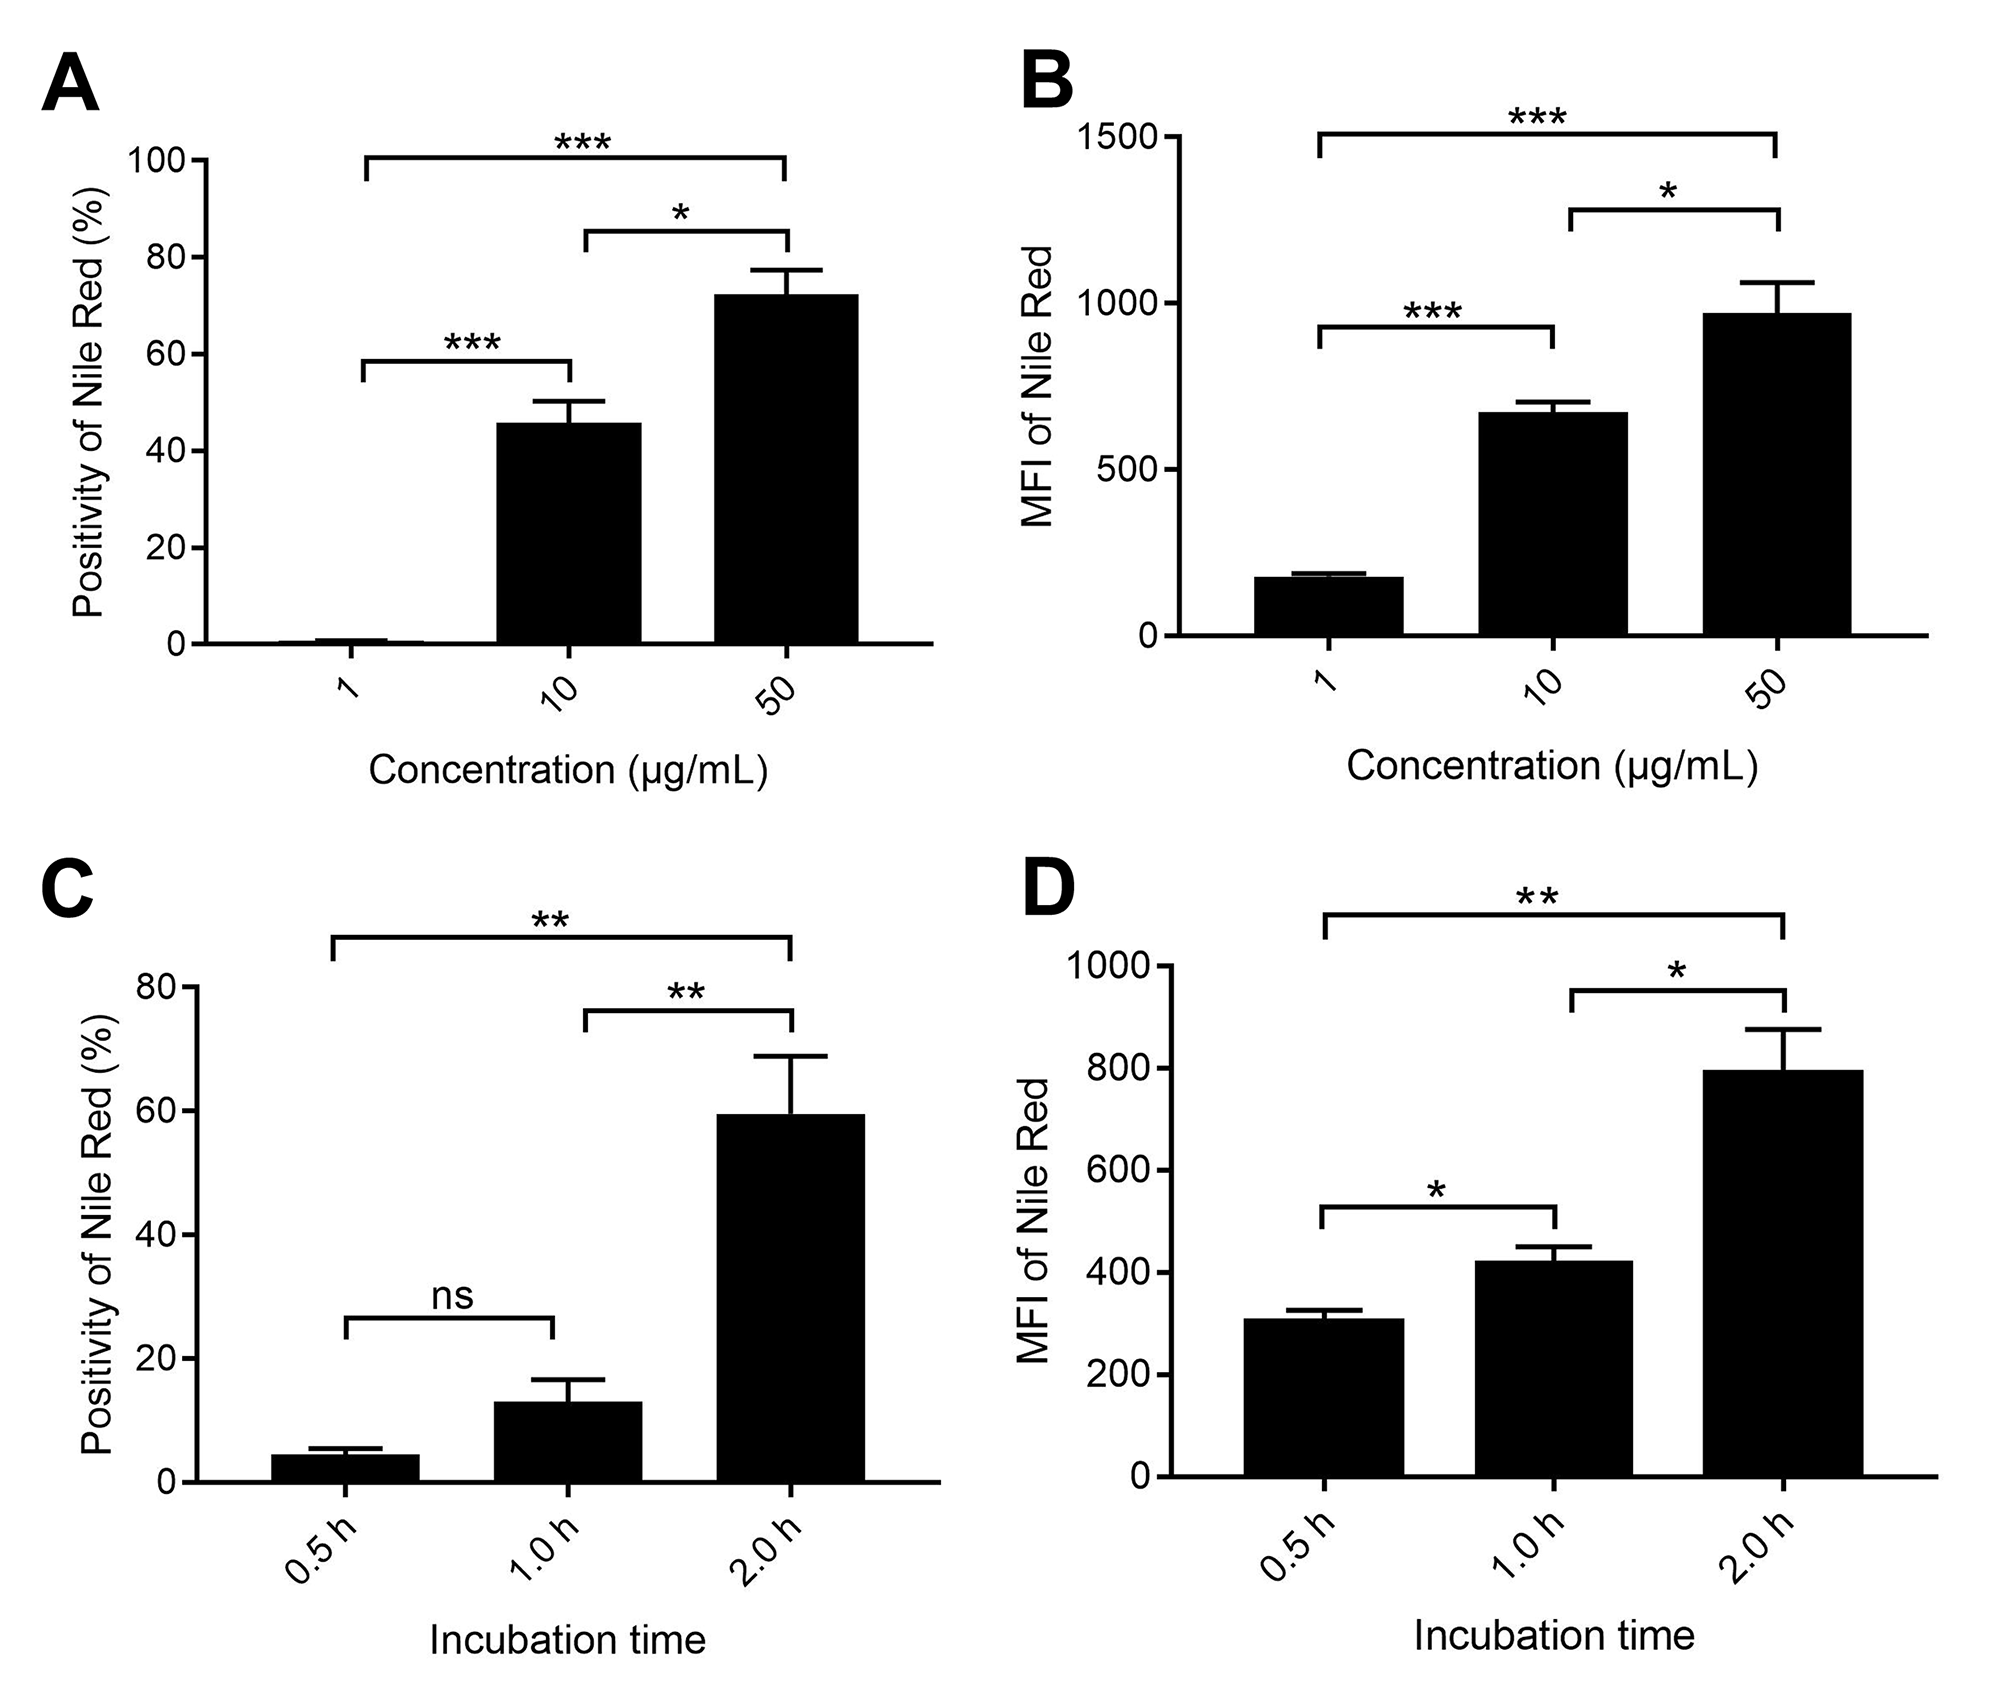
Figure S6** Macrophages phagocytose nile red-labeled MPA@Dex-MPA NPs in time and concentration-dependent manners *in vitro*. (**A**) The positivity rate and (**B**) the mean fluorescence intensity (MFI) of nile red in BMDMs after treated with different concentrations of NPs (1, 10, 50 μg/mL) for 2 h (n = 5/group). (**C**) The positivity rate and (**D**) the MFI of nile red in BMDMs after treated with 10 μg/mL of NPs for a different time period (0.5, 1.0, 2.0 h) (n = 5/group). Error bar represent mean ± SEM. **P* < 0.05, ***P* < 0.01, ****P* < 0.001, ns, not significant.


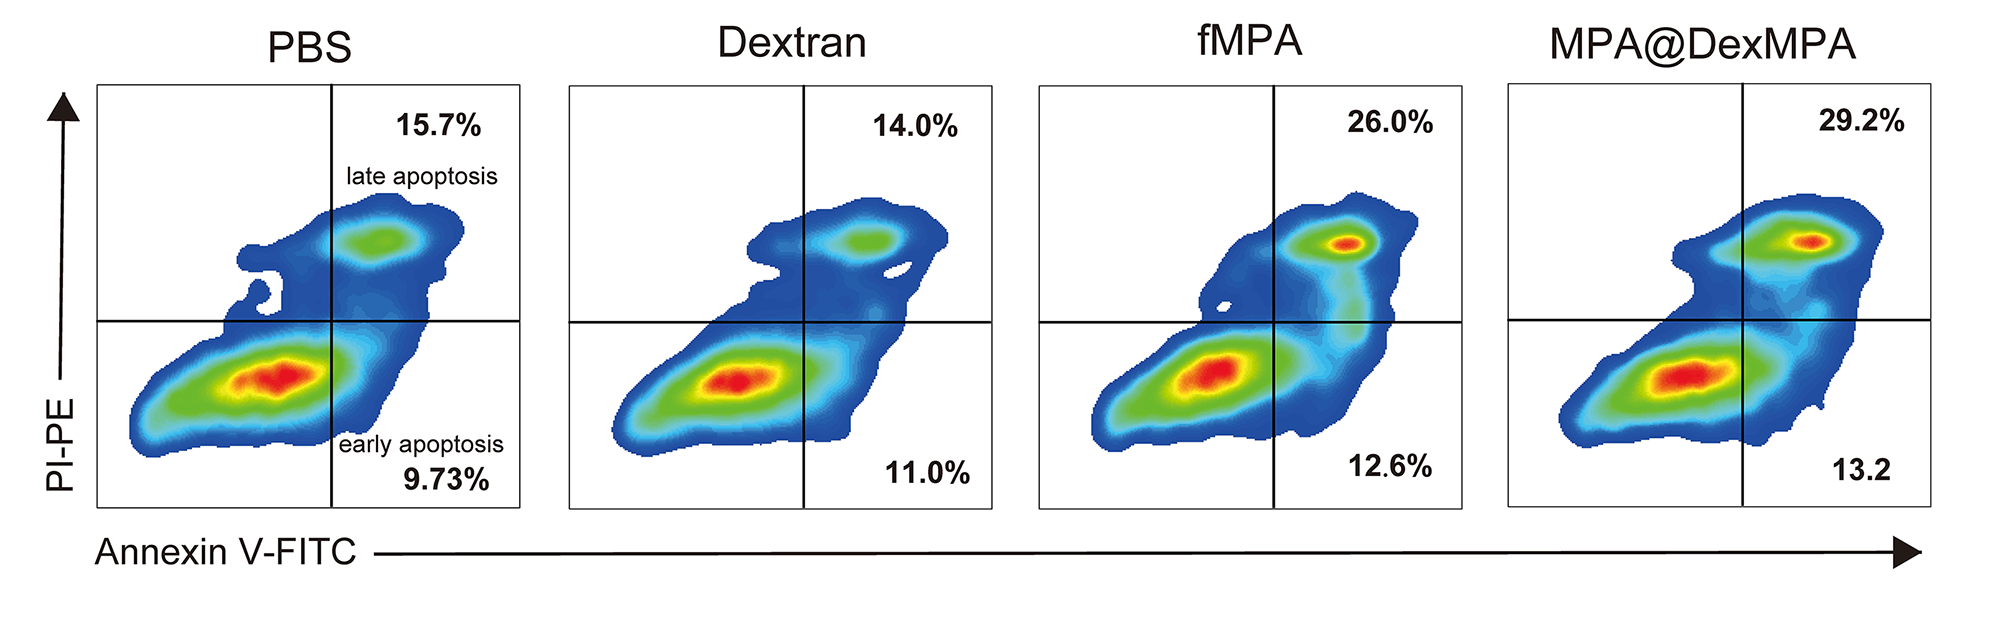


**Figure S7** MPA@Dex-MPA NPs induced apoptosis of BMDMs *in vitro*. Represent flow cytometry images of cells’ apoptosis after BMDMs were treated with PBS, dextran, fMPA or MPA@Dex-MPA NPs for 72 h (n = 5/group).


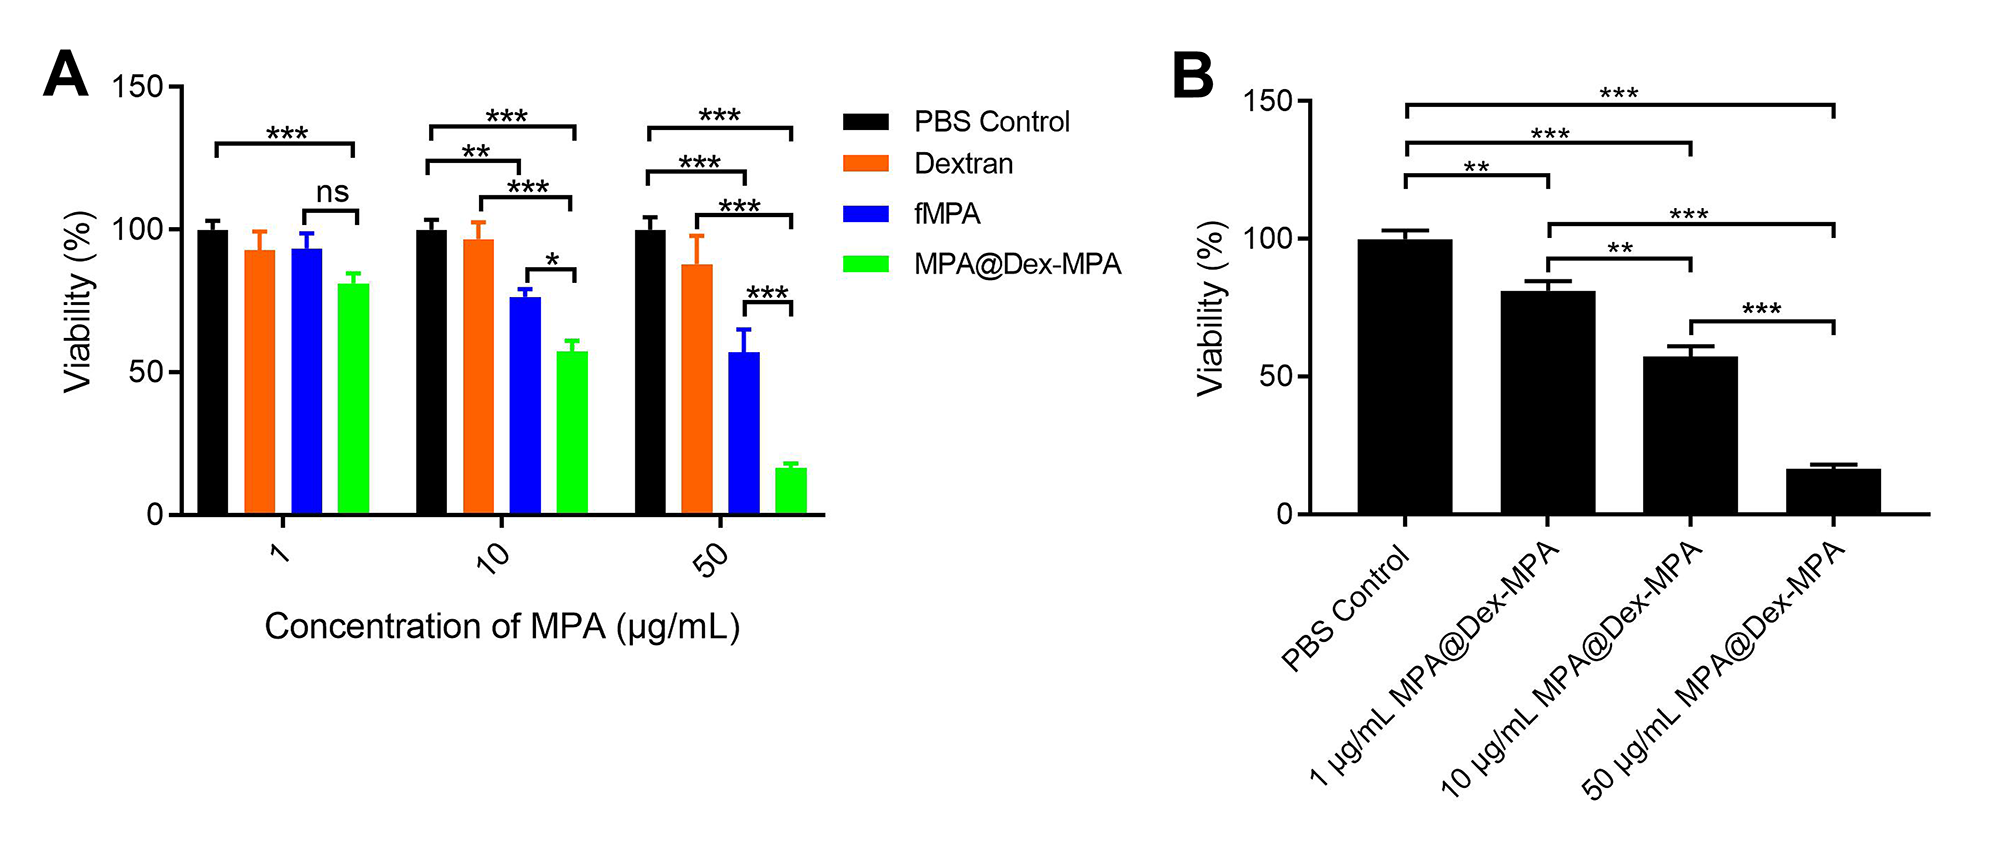


**Figure S8** MPA@Dex-MPA NPs inhibit the viability of BMDMs in a dose-dependent manner. (**A**) CCK-8 analysis of BMDM viability after being treated with different concentration of dextran, fMPA or MPA@Dex-MPA NPs (1, 10, 50 μg/mL) for 48 h, relative to the PBS control group (n = 5/group). (**B**) CCK-8 analysis of BMDM viability after being treated with different concentration of MPA@Dex-MPA NPs (1, 10, 50 μg/mL) for 48 h, relative to the PBS control group (n = 5/group). Error bar represent mean ± SEM. **P* < 0.05, ***P* < 0.01, ****P* < 0.001, ns, not significant.
